# Supplementary figures and images for: E-Cadherin Deficiency Initiates Gastric Signet-Ring Cell Carcinoma in Mice and Man
Source: Oxford University Press journal article supplement (doi:10.1158/0008-5472.can-08-2457), 2009-02-17

# Supplementary Figure 1

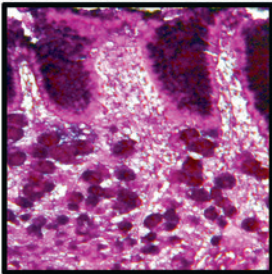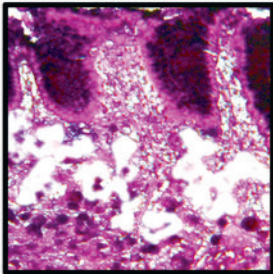

Supplement: 00085472can082457-sup-sfig_1.pdf [file 00085472can082457-sup-sfig_1.pdf]

# Supplementary Figure 2

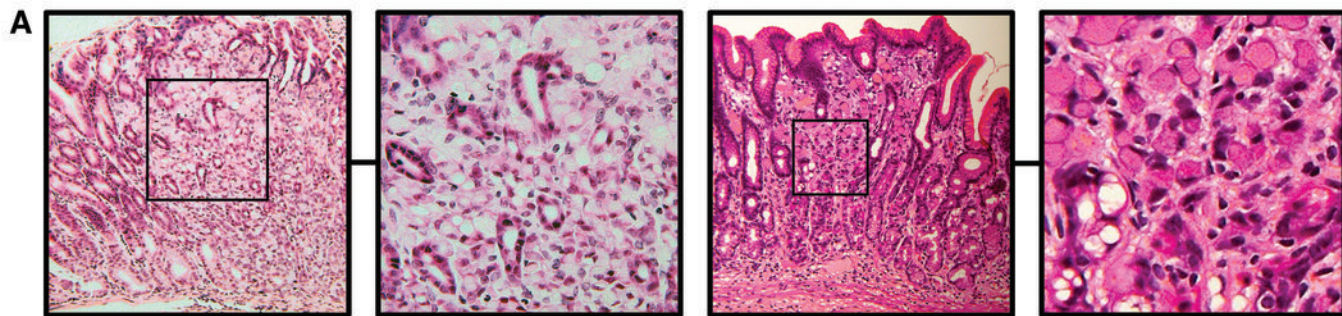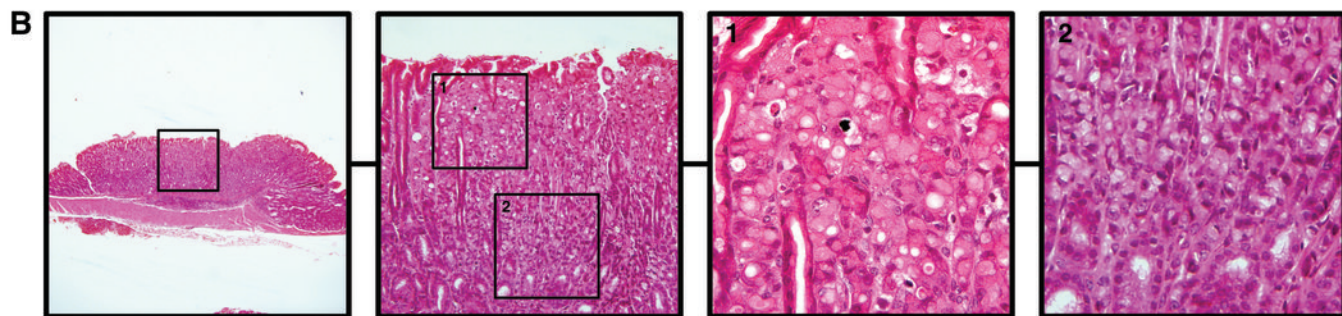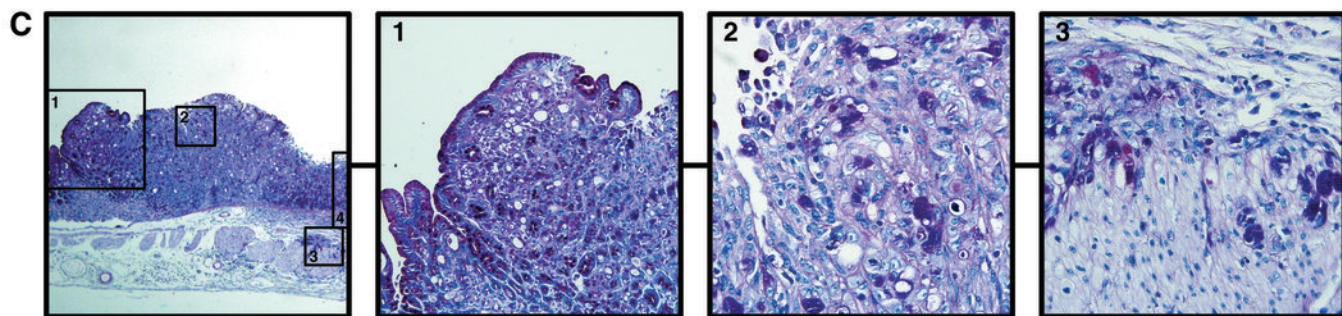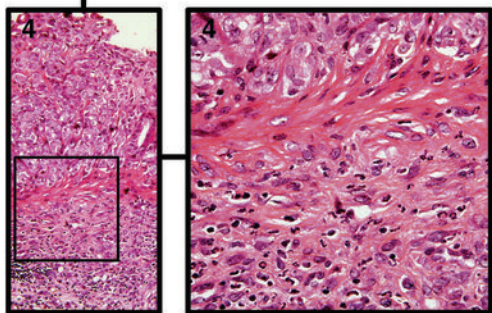

squamous  
fore  
stomach

glandular  
stomach

duodenum

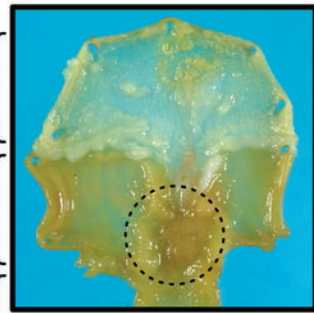

Supplement: 00085472can082457-sup-sfig_2.pdf [file 00085472can082457-sup-sfig_2.pdf]

# Supplementary Figure 3

**A**

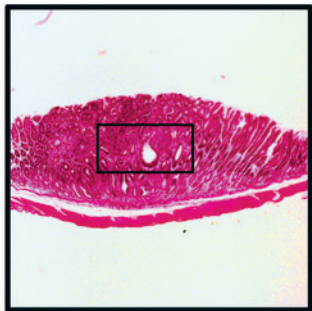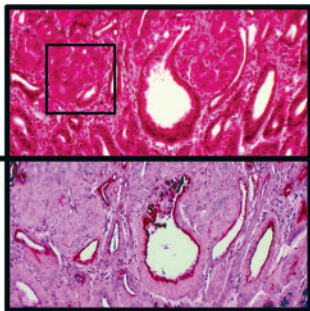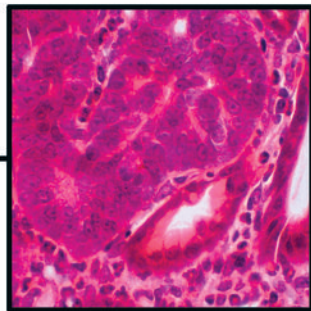

**B**

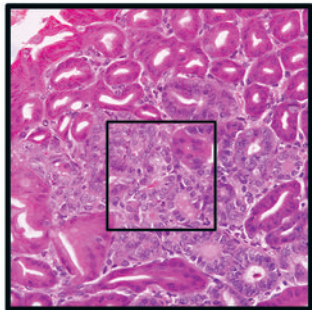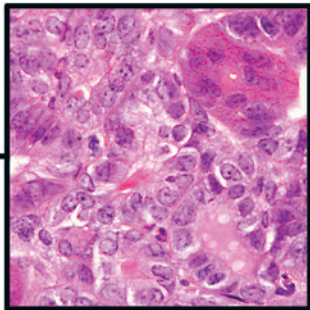

Supplement: 00085472can082457-sup-sfig_3.pdf [file 00085472can082457-sup-sfig_3.pdf]

# Supplementary Figure 4

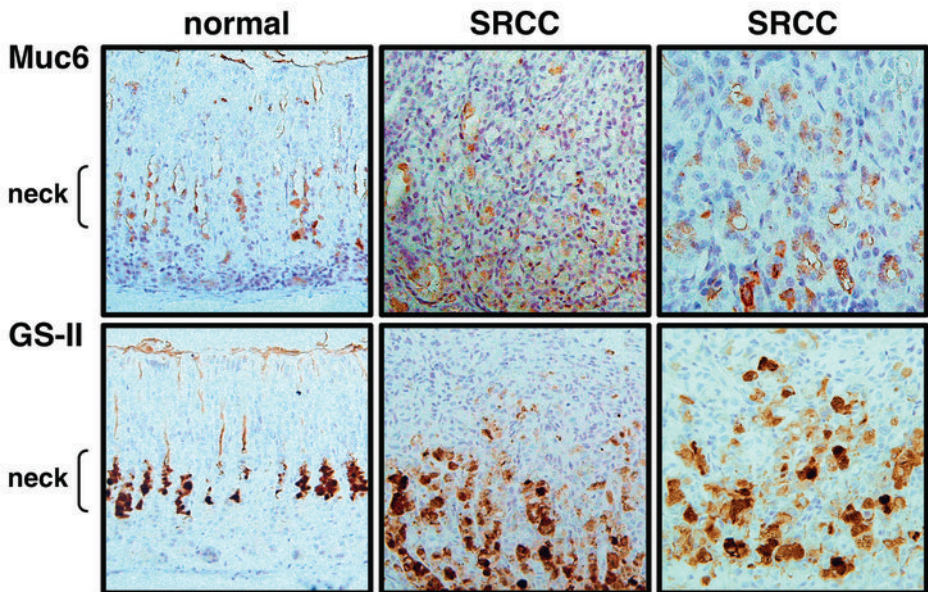

Supplement: 00085472can082457-sup-sfig_4.pdf [file 00085472can082457-sup-sfig_4.pdf]

## Supplementary Figure 5

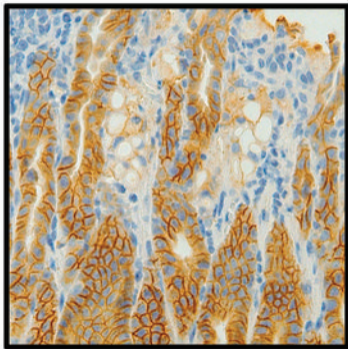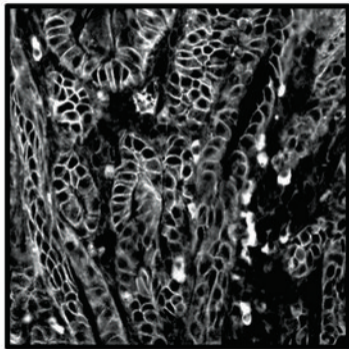

Supplement: 00085472can082457-sup-sfig_5.pdf [file 00085472can082457-sup-sfig_5.pdf]
